# Supplementary material for: Platinum-specific detection and quantification of oxaliplatin and Pt(R,R-diaminocyclohexane)Cl2 in the blood plasma of colorectal cancer patients
Source: Royal Society of Chemistry journal article supplement (doi:10.1039/b716925f), 2008-01-01

### Electronic Supplementary Data

Table S1. Data on calibration curve. <sup>a</sup>

|                     | Calibration standard curve |     |     |     |     |     | Linear regression parameters |             |        |
|---------------------|----------------------------|-----|-----|-----|-----|-----|------------------------------|-------------|--------|
|                     |                            |     |     |     |     |     | Slope                        | Y-intercept | $r^2$  |
| Nominal conc. (nM)  | 50                         | 100 | 200 | 300 | 400 | 500 |                              |             |        |
| Measured conc. (nM) | 49                         | 102 | 201 | 305 | 407 | 489 | 1.24                         | 2.10        | 0.9974 |
| Recovery (%)        | 98                         | 102 | 99  | 102 | 102 | 102 |                              |             |        |

<sup>a</sup> All measured data values are expressed as mean of 3 repeats with coefficient of variation of  $\leq 10\%$

Table S2. Intra- and inter-assay recovery and precision. <sup>a</sup>

|             | Oxaliplatin conc. (nM) | % Recovery | Precision (%C.V.) |
|-------------|------------------------|------------|-------------------|
| Intra-assay | 50                     | 101        | 7.12              |
|             | 200                    | 107        | 4.35              |
|             | 500                    | 106        | 5.22              |
| Inter-assay | 50                     | 102        | 3.30              |
|             | 200                    | 104        | 5.65              |
|             | 500                    | 103        | 4.39              |

<sup>a</sup> All measured data values are expressed as mean of  $\geq 5$  repeats with coefficient of variation of  $\leq 10\%$ .

Table S3. Stability of oxaliplatin in MDP under different conditions. All data values are expressed as mean  $\pm$  standard deviation of 3 repeats.

| Recovery (%) of oxaliplatin after indicated time |            |               |               |               |              |
|--------------------------------------------------|------------|---------------|---------------|---------------|--------------|
| On Ice                                           | Time (h)   | 2             | 4             |               |              |
|                                                  |            | 109 $\pm$ 7   | 112 $\pm$ 3.7 |               |              |
| At -80 °C                                        | Time (day) | 1             | 4             | 9             | 90           |
|                                                  |            | 104 $\pm$ 4.1 | 110 $\pm$ 6.9 | 111 $\pm$ 4.6 | 98 $\pm$ 1.3 |

Fig. S1. HPLC-ICP-MS chromatogram of stability samples of MDP containing oxaliplatin stored on ice for 4 h (A) and at -80°C for 90 days (B).

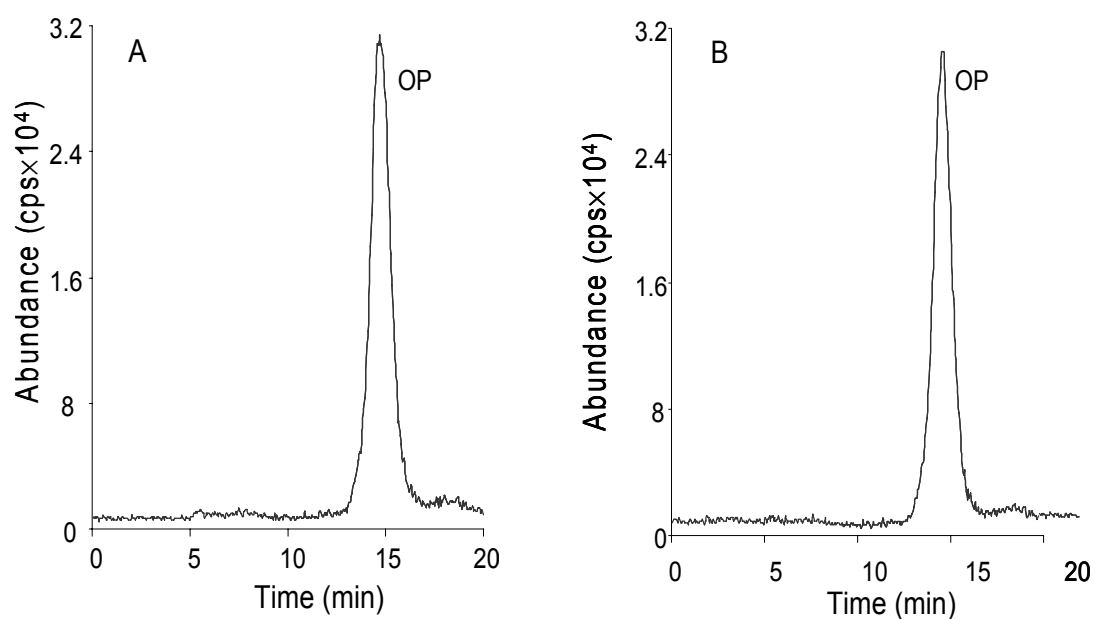

Fig. S2. Analysis of plasma from colorectal cancer patients showing concentrations of oxaliplatin during and after a 2-h infusion (A), and a chromatogram of 1-h post-infusion sample (B).

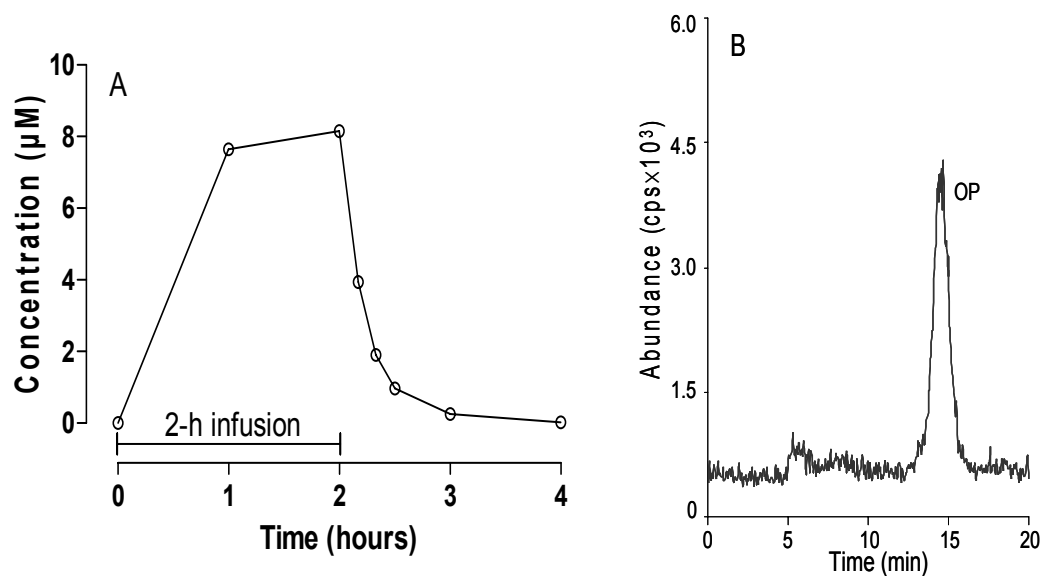

Supplement: b716925f.pdf [file b716925f.pdf]
